# Supplementary material for: Sphingomonas Relies on Chemotaxis to Degrade Polycyclic Aromatic Hydrocarbons and Maintain Dominance in Coking Sites
Source: MDPI journal article supplement (doi:10.3390/microorganisms10061109), 2022-05-27
Supplement: s1 [file s1]

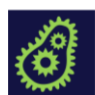

## Article

# *Sphingomonas* relies on chemotaxis to degrade polycyclic aromatic hydrocarbons and maintain dominance in coking sites

Meng Zhou <sup>1</sup>, Zishu Liu <sup>1</sup>, Jiaqi Wang <sup>1</sup> and Yuxiang Zhao <sup>1</sup> and Baolan Hu <sup>1,2,3,\*</sup>

## Supplementary Information

Table S1. Detection limit of the 16 PAHs test.

| Test items             | NAP  | ACY | ACE | FLO  | PHE | ANT | FLA | PYR |
|------------------------|------|-----|-----|------|-----|-----|-----|-----|
| Detection limit(mg/kg) | 0.09 | 0.1 | 0.1 | 0.08 | 0.1 | 0.1 | 0.2 | 0.1 |
| Test items             | BaA  | BaP | BbF | BkF  | CHR | DhA | IcP | BgP |
| Detection limit(mg/kg) | 0.1  | 0.1 | 0.2 | 0.1  | 0.1 | 0.1 | 0.1 | 0.1 |

Abbreviations: NAP-naphthalene; ACY-acenaphthylene; ACE-Acenaphthene; FLO-fluorene; PHE-phenanthrene; ANT-anthracene; FLA-fluoranthene; PYR-pyrene; BaA-benzo[a]anthracene; BaP-benzo[a]pyrene; BbF-benzo[b]fluoranthene; BkF-benzo[k]fluoranthene; CHR-chrysene; DhA-dibenzo[a,h]anthracene; IcP-indeno[1,2,3-cd]pyrene; BgP-benzo[g,h,i]perylene.

**Table S2.** Relative abundance of 64 core species (T: 0–10 cm; M: 10–30 cm; B: 30–100 cm). Based on the criteria of average relative abundance of >0.1% and occurrence frequency of >80%, the core species in the site's soil were screened.

| species               | Relative Abundance/% |         |         |          |          |          |
|-----------------------|----------------------|---------|---------|----------|----------|----------|
|                       | Day 0-T              | Day 0-M | Day 0-B | Day 70-T | Day 70-M | Day 70-B |
| <i>Sphingomonas</i>   | 1.04                 | 2.33    | 3.12    | 8.89     | 13.78    | 6.73     |
| <i>MND1</i>           | 2.95                 | 2.50    | 2.35    | 2.42     | 2.89     | 7.04     |
| <i>Ellin6067</i>      | 1.11                 | 0.64    | 0.48    | 5.81     | 5.28     | 3.93     |
| <i>RB41</i>           | 4.90                 | 3.29    | 2.17    | 1.71     | 0.29     | 1.79     |
| <i>Nitrospira</i>     | 0.59                 | 2.37    | 1.15    | 0.53     | 0.91     | 0.96     |
| <i>Dongia</i>         | 1.19                 | 1.53    | 1.73    | 0.52     | 0.54     | 0.92     |
| <i>Haliangium</i>     | 0.90                 | 1.24    | 0.52    | 0.89     | 0.68     | 0.84     |
| <i>Steroidobacter</i> | 0.82                 | 0.65    | 0.96    | 0.52     | 0.29     | 1.73     |
| <i>Bryobacter</i>     | 1.31                 | 0.89    | 0.42    | 0.67     | 1.26     | 0.40     |

|                              |      |      |      |      |      |      |
|------------------------------|------|------|------|------|------|------|
| <i>Ramlibacter</i>           | 0.11 | 0.54 | 0.08 | 1.36 | 1.75 | 1.00 |
| <i>Bradyrhizobium</i>        | 0.85 | 0.84 | 0.54 | 0.63 | 0.81 | 0.48 |
| <i>Terrimonas</i>            | 0.40 | 0.60 | 0.20 | 0.72 | 0.78 | 0.32 |
| <i>IS-44</i>                 | 0.17 | 0.48 | 0.55 | 0.63 | 0.33 | 0.40 |
| <i>Sulfurifustis</i>         | 0.03 | 0.10 | 2.20 | 0.03 | 0.02 | 0.13 |
| <i>Reyranella</i>            | 0.51 | 0.41 | 0.26 | 0.33 | 0.58 | 0.34 |
| <i>Pedomicrobium</i>         | 0.58 | 0.60 | 0.81 | 0.05 | 0.10 | 0.20 |
| <i>Gaiella</i>               | 0.42 | 0.39 | 0.35 | 0.22 | 0.29 | 0.65 |
| <i>Rhodoplanes</i>           | 0.39 | 0.30 | 0.04 | 0.57 | 0.49 | 0.44 |
| <i>Acidibacter</i>           | 0.99 | 0.36 | 0.33 | 0.21 | 0.07 | 0.23 |
| <i>Flavitalea</i>            | 0.07 | 0.31 | 0.04 | 0.61 | 0.52 | 0.63 |
| <i>Pseudarthrobacter</i>     | 0.02 | 0.57 | 0.20 | 0.39 | 0.49 | 0.41 |
| <i>Gemmatimonas</i>          | 0.18 | 0.36 | 0.50 | 0.45 | 0.33 | 0.24 |
| <i>Chthoniobacter</i>        | 0.98 | 0.19 | 0.05 | 0.46 | 0.27 | 0.09 |
| <i>Phenylobacterium</i>      | 0.17 | 0.15 | 0.17 | 0.75 | 0.53 | 0.21 |
| <i>Streptomyces</i>          | 0.09 | 0.18 | 0.25 | 0.42 | 0.48 | 0.44 |
| <i>Polycyclovorans</i>       | 0.10 | 0.51 | 0.77 | 0.05 | 0.07 | 0.32 |
| <i>Candidatus_Solibacter</i> | 0.46 | 0.43 | 0.13 | 0.20 | 0.36 | 0.16 |
| <i>Subgroup_10</i>           | 1.21 | 0.23 | 0.23 | 0.02 | 0.02 | 0.02 |
| <i>Flavobacterium</i>        | 0.31 | 1.01 | 0.12 | 0.17 | 0.05 | 0.05 |
| <i>Pseudomonas</i>           | 0.24 | 0.91 | 0.30 | 0.08 | 0.06 | 0.09 |
| <i>SWB02</i>                 | 0.36 | 0.31 | 0.79 | 0.02 | 0.07 | 0.04 |
| <i>Niastella</i>             | 0.19 | 0.14 | 0.07 | 0.53 | 0.52 | 0.02 |
| <i>Bacillus</i>              | 0.03 | 0.09 | 0.45 | 0.26 | 0.19 | 0.39 |
| <i>Flavisolibacter</i>       | 0.05 | 0.10 | 0.03 | 0.57 | 0.58 | 0.08 |
| <i>Altererythrobacter</i>    | 0.17 | 0.11 | 0.18 | 0.22 | 0.40 | 0.28 |
| <i>Nordella</i>              | 0.24 | 0.54 | 0.18 | 0.10 | 0.17 | 0.11 |
| <i>Lysobacter</i>            | 0.20 | 0.13 | 0.06 | 0.15 | 0.18 | 0.53 |

|                               |      |      |      |      |      |      |
|-------------------------------|------|------|------|------|------|------|
| <i>Hyphomicrobium</i>         | 0.15 | 0.20 | 0.30 | 0.11 | 0.15 | 0.22 |
| <i>Candidatus_Udaeobacter</i> | 0.51 | 0.09 | 0.02 | 0.23 | 0.13 | 0.13 |
| <i>Iamia</i>                  | 0.15 | 0.16 | 0.32 | 0.07 | 0.08 | 0.31 |
| <i>Stenotrophobacter</i>      | 0.72 | 0.17 | 0.17 | 0.01 | 0.00 | 0.01 |
| <i>Opitutus</i>               | 0.10 | 0.08 | 0.03 | 0.29 | 0.35 | 0.20 |
| <i>Cupriavidus</i>            | 0.02 | 0.19 | 0.05 | 0.21 | 0.41 | 0.17 |
| <i>Caenimonas</i>             | 0.01 | 0.04 | 0.03 | 0.14 | 0.16 | 0.61 |
| <i>Ferruginibacter</i>        | 0.09 | 0.14 | 0.02 | 0.38 | 0.31 | 0.03 |
| <i>Thiobacillus</i>           | 0.00 | 0.01 | 0.91 | 0.00 | 0.00 | 0.01 |
| <i>Massilia</i>               | 0.03 | 0.11 | 0.09 | 0.24 | 0.23 | 0.23 |
| <i>Mesorhizobium</i>          | 0.06 | 0.07 | 0.06 | 0.24 | 0.38 | 0.10 |
| <i>mle1-7</i>                 | 0.28 | 0.33 | 0.10 | 0.06 | 0.01 | 0.11 |
| <i>Novosphingobium</i>        | 0.03 | 0.06 | 0.04 | 0.37 | 0.27 | 0.12 |
| <i>SM1A02</i>                 | 0.44 | 0.11 | 0.08 | 0.10 | 0.05 | 0.09 |
| <i>Hirschia</i>               | 0.38 | 0.23 | 0.14 | 0.05 | 0.02 | 0.04 |
| <i>Mycobacterium</i>          | 0.17 | 0.14 | 0.27 | 0.10 | 0.04 | 0.07 |
| <i>Sphingobium</i>            | 0.01 | 0.12 | 0.16 | 0.20 | 0.20 | 0.04 |
| <i>Rhizobium</i>              | 0.08 | 0.11 | 0.07 | 0.17 | 0.23 | 0.07 |
| <i>Ilumatobacter</i>          | 0.15 | 0.17 | 0.14 | 0.11 | 0.05 | 0.09 |
| <i>Bdellovibrio</i>           | 0.14 | 0.19 | 0.09 | 0.07 | 0.06 | 0.15 |
| <i>Nocardioides</i>           | 0.14 | 0.25 | 0.06 | 0.06 | 0.07 | 0.12 |
| <i>Pseudorhodoplanes</i>      | 0.18 | 0.12 | 0.12 | 0.09 | 0.10 | 0.07 |
| <i>PAUC26f</i>                | 0.01 | 0.05 | 0.51 | 0.02 | 0.06 | 0.02 |
| <i>AKYG587</i>                | 0.50 | 0.04 | 0.11 | 0.01 | 0.00 | 0.02 |
| <i>Anaeromyxobacter</i>       | 0.00 | 0.03 | 0.43 | 0.04 | 0.01 | 0.11 |
| <i>Pseudolabrys</i>           | 0.09 | 0.08 | 0.12 | 0.09 | 0.07 | 0.17 |
| <i>Comamonas</i>              | 0.28 | 0.25 | 0.05 | 0.02 | 0.01 | 0.01 |

**Table S3.** Results of read-filtering in sequencing data analysis (T: 0–10 cm; M: 10–30 cm; B: 30–100 cm).

|                              | Day 0-T | Day 0-M | Day 0-B | Day 70-T | Day 70-M | Day 70-B |
|------------------------------|---------|---------|---------|----------|----------|----------|
| Number of reads              | 121840  | 130387  | 126842  | 83998    | 83954    | 84000    |
| Filtered reads               | 121481  | 129997  | 126396  | 83809    | 83782    | 83802    |
| Unique reads after filtering | 106742  | 98570   | 115603  | 77105    | 67642    | 74988    |
| Chimeric reads               | -       | -       | -       | -        | -        | -        |
| Unique chimeric reads        | -       | -       | -       | -        | -        | -        |
| Reads in OTUs                | 55184   | 54954   | 56180   | 42875    | 42739    | 42321    |

**Table S4.** Alpha biodiversity indicators of microbes at the coking site (T: 0–10 cm; M: 10–30 cm; B: 30–100 cm).

| Alpha-biodiversity | Day 0-T | Day 0-M | Day 0-B | Day 70-T | Day 70-M | Day 70-B |
|--------------------|---------|---------|---------|----------|----------|----------|
| chao1              | 3453.2  | 3959.3  | 4001.3  | 2572.4   | 2374.7   | 2660.5   |
| shannon            | 9.36    | 9.91    | 9.82    | 8.56     | 8.38     | 8.95     |

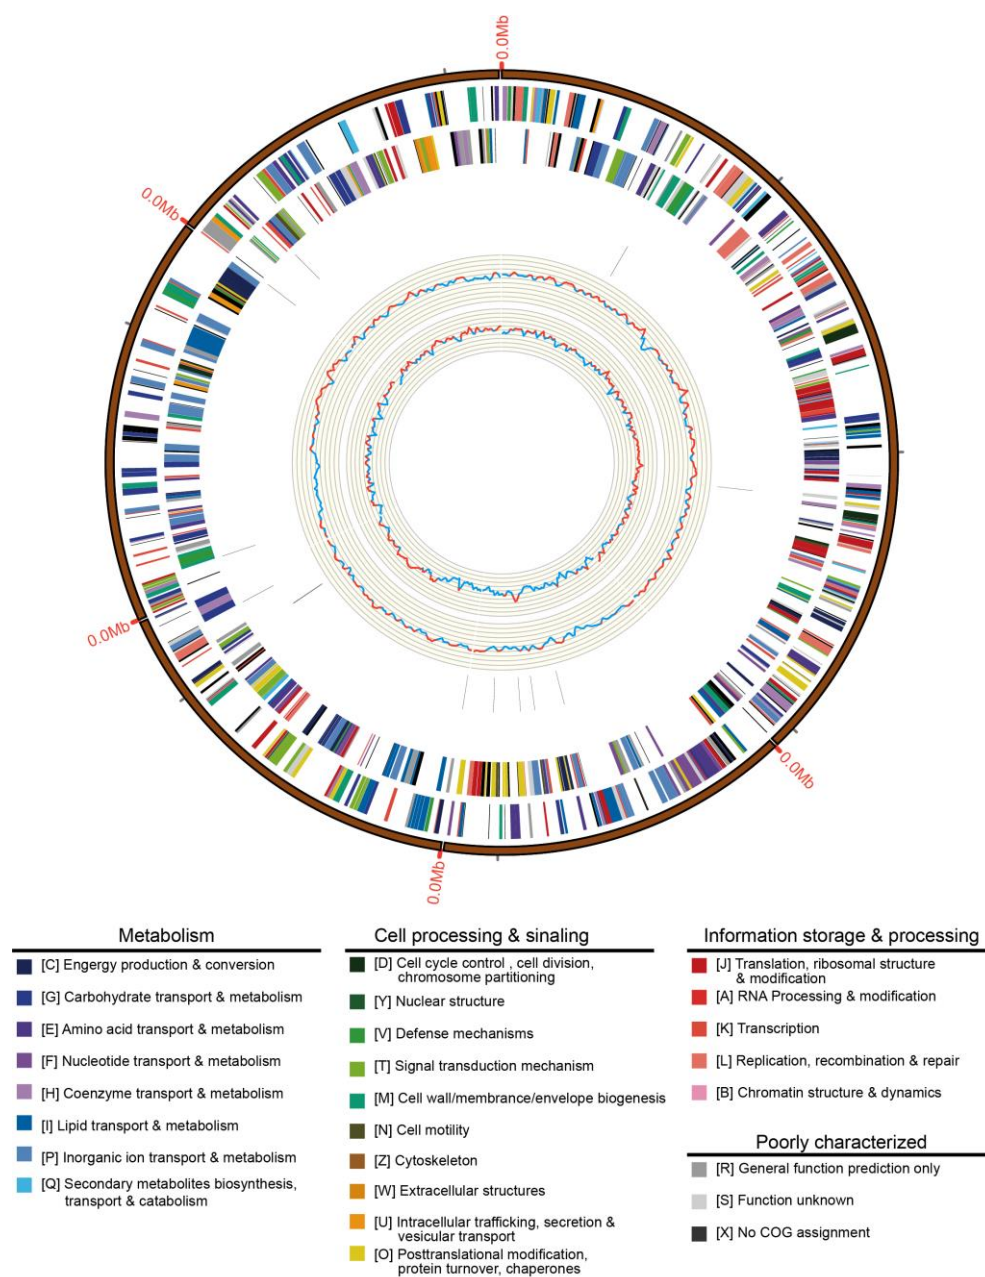

Rings from the outermost to the center:

- 1) scale marks of the genome
- 2) protein-coding genes on the forward strand
- 3) protein-coding genes on the reverse strand
- 4) tRNA (black) and rRNA (red) genes on the forward strand
- 5) tRNA (black) and rRNA (red) genes on the reverse strand
- 6) GC content
- 7) GC skew

Protein-coding genes are color coded according to their COG categories.

**Figure S1.** *Sphingomonas* sp. genome circle map.

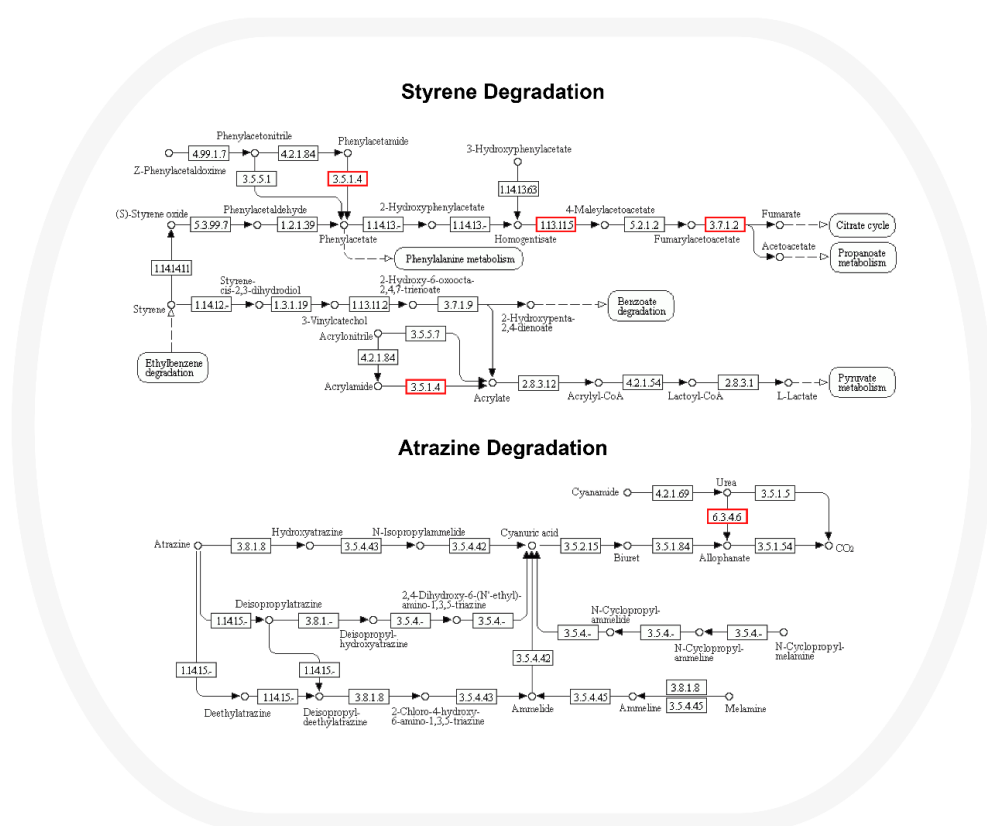

**Figure S2.** *Sphingomonas* sp. metabolic pathways for the degradation of styrene and atrazine.

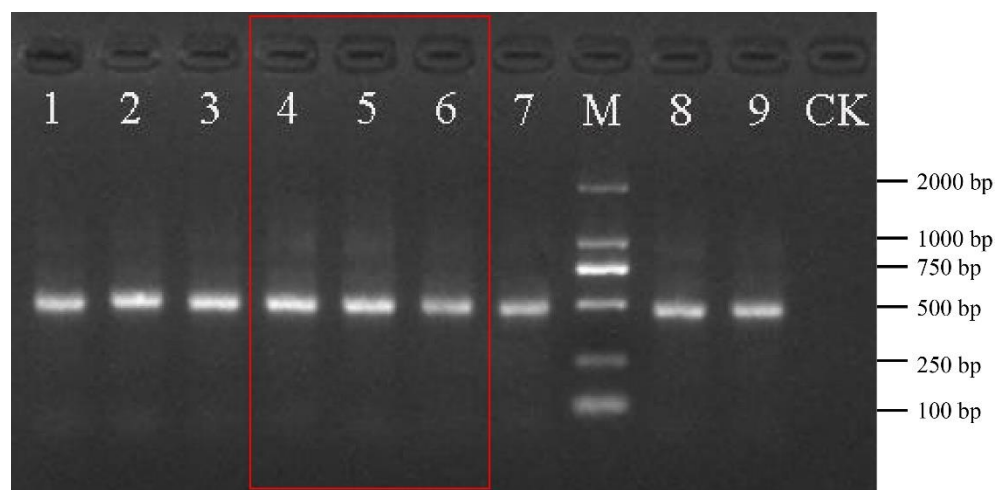

**Figure S3.** Gel electrophoresis images of the PCR products of DNA from soil samples on Day 0.

**Table S5.** Concentrations of the PCR products of DNA from soil samples on Day 0.

| Sample  | Lane | Concentration/(ng/μL) |
|---------|------|-----------------------|
| Day 0-T | 4    | 30.78                 |
| Day 0-M | 5    | 28.81                 |
| Day 0-B | 6    | 21.74                 |

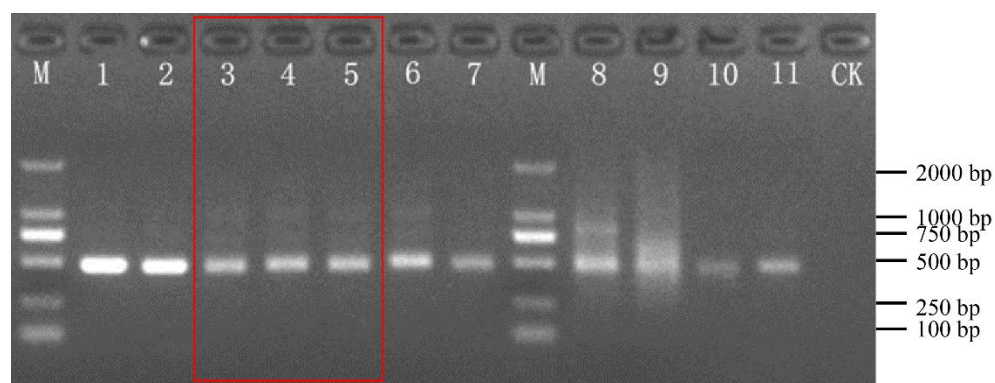

**Figure S4.** Gel electrophoresis images of the PCR products of DNA from soil samples on Day 70.

**Table S6.** Concentrations of the PCR products of DNA from soil samples on Day 70.

| Sample   | Lane | Concentration/(ng/ $\mu$ L) |
|----------|------|-----------------------------|
| Day 70-T | 3    | 21.78                       |
| Day 70-M | 4    | 23.51                       |
| Day 70-B | 5    | 22.98                       |
